# Supplementary material
Source: Springer Nature journal article supplement (https://www.springermedizin.de/resource/supplementary/13014_2014_1098_MOESM1_ESM.pdf/9634888)

**In-field**

66%

13%

2%

0%

15%

1%

3%

**Distant**

**Marginal**

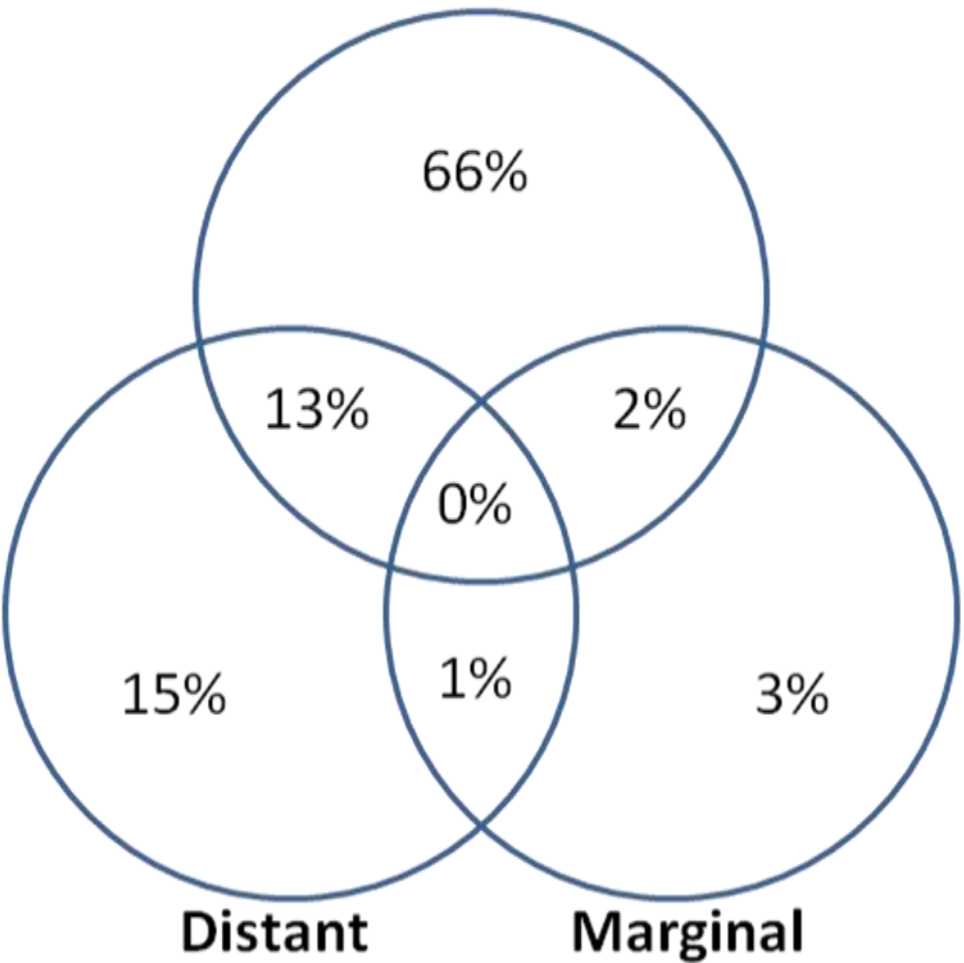

Supplement: MOESM1 [file 9634888]
